# Supplementary material for: Learning from Each Other: A Multisite Collaborative to Reduce Electrolyte Testing
Source: PubMed Central journal article supplement — Pediatr Qual Saf. 2020 Oct 26;5(6):e351. doi: 10.1097/pq9.0000000000000351 (PMC7591129; doi:10.1097/pq9.0000000000000351), 2020-10-26
Supplement: pqs-5-e351-s001.pdf [file pqs-5-e351-s001.pdf]

## How Much Does That Test Cost?

Figures based on CHA PHIS cost and charge data

| Laboratory Test Name                                  | Estimated Cost |
|-------------------------------------------------------|----------------|
| 14 Test Chemistry Panel<br>(Complete Metabolic Panel) | \$50           |
| 8 Test Chemistry Panel<br>(Basic Metabolic Panel)     | \$45           |
| 8 Test Chemistry Panel<br>with Ionized Calcium        | \$54           |
| Electrolyte Panel                                     | \$33           |
| Kidney Panel<br>(Renal Function Panel)                | \$45           |
| Calcium                                               | \$8            |
| Carbon Dioxide (CO <sup>2</sup> )                     | \$11           |
| Chloride                                              | \$8            |
| Ionized Calcium                                       | \$32           |
| Magnesium                                             | \$21           |
| Phosphorus                                            | \$16           |
| Potassium                                             | \$12           |
| Sodium                                                | \$12           |

### Cost = Indirect Cost + Direct Cost

Indirect Cost: Cost of keeping the lights on, taxes, etc.

Direct Cost: Cost of running the lab

### FAQ's about "Add-Ons"

1. When ordering electrolytes, you have 12 hours to add additional studies
2. The electrolytes most likely to change while sitting in lab are:  
**K<sup>+</sup>, glucose, CO<sup>2</sup>**

Please note that costs are estimated based on charge data and do not reflect actual charges for a lab test.
