# Supplementary material for: Learning from Each Other: A Multisite Collaborative to Reduce Electrolyte Testing
Source: PubMed Central journal article supplement — Pediatr Qual Saf. 2020 Oct 26;5(6):e351. doi: 10.1097/pq9.0000000000000351 (PMC7591129; doi:10.1097/pq9.0000000000000351), 2020-10-26
Supplement: pqs-5-e351-s002.pdf [file pqs-5-e351-s002.pdf]

.ped\_lab-plan

Lab Schedule for Patient:

Labs needed: \_\_\_\_\_

Date: \_\_\_\_\_ Time: \_\_\_\_\_

Reason: \_\_\_\_\_
