# Supplementary material for: Learning from Each Other: A Multisite Collaborative to Reduce Electrolyte Testing
Source: PubMed Central journal article supplement — Pediatr Qual Saf. 2020 Oct 26;5(6):e351. doi: 10.1097/pq9.0000000000000351 (PMC7591129; doi:10.1097/pq9.0000000000000351), 2020-10-26

# Hospital "A" Electrolyte Labs ordered per 10 patient days

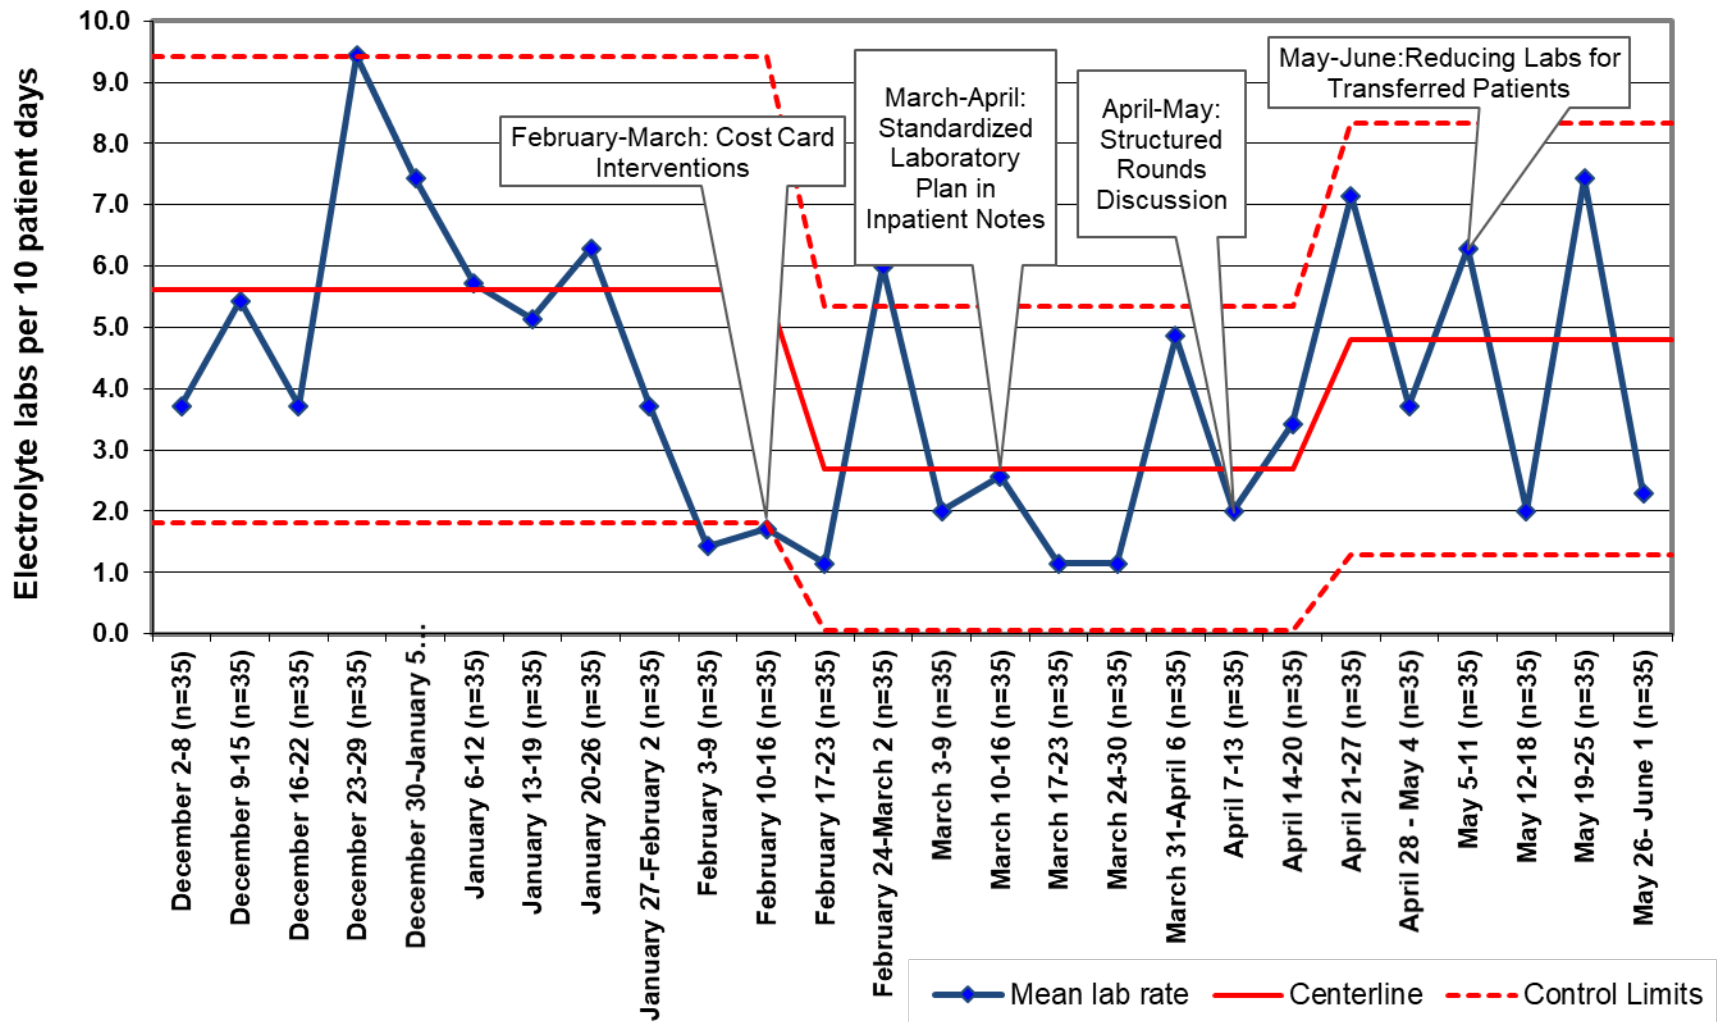

# Hospital "B" Electrolyte Labs ordered per 10 patient days

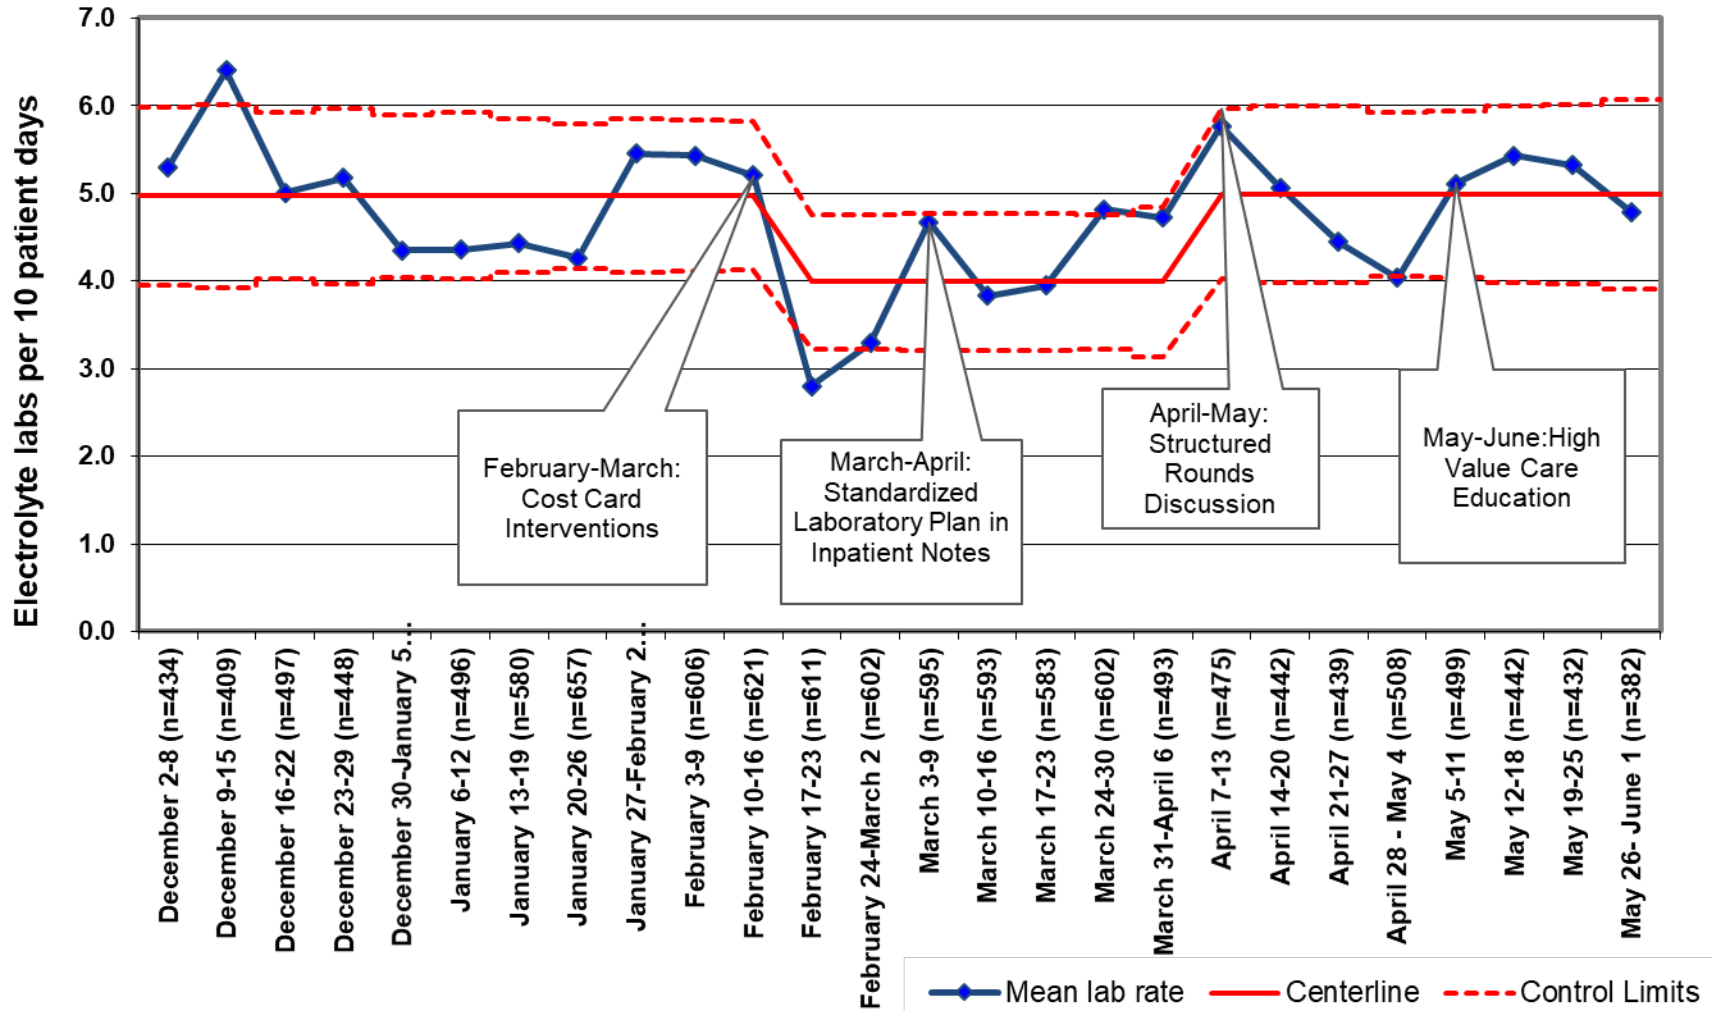

# Hospital "C" Electrolyte Labs ordered per 10 patient days

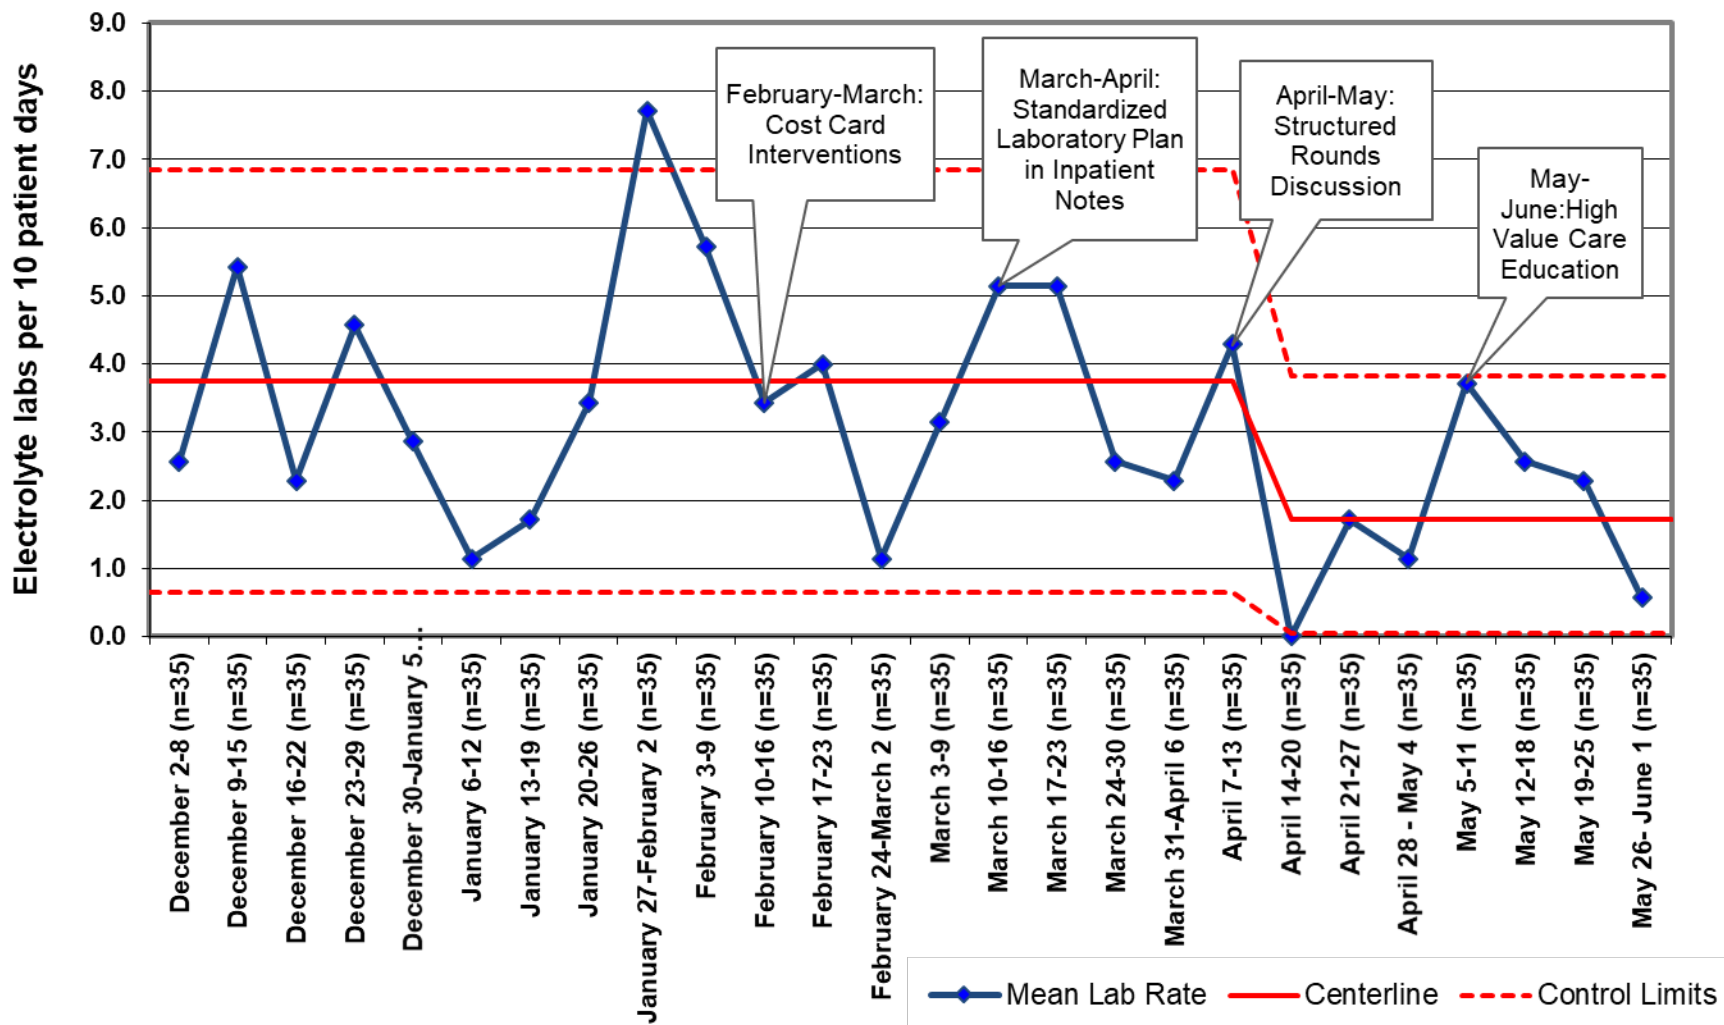

## Hospital "D" Electrolyte Labs ordered per 10 patient days

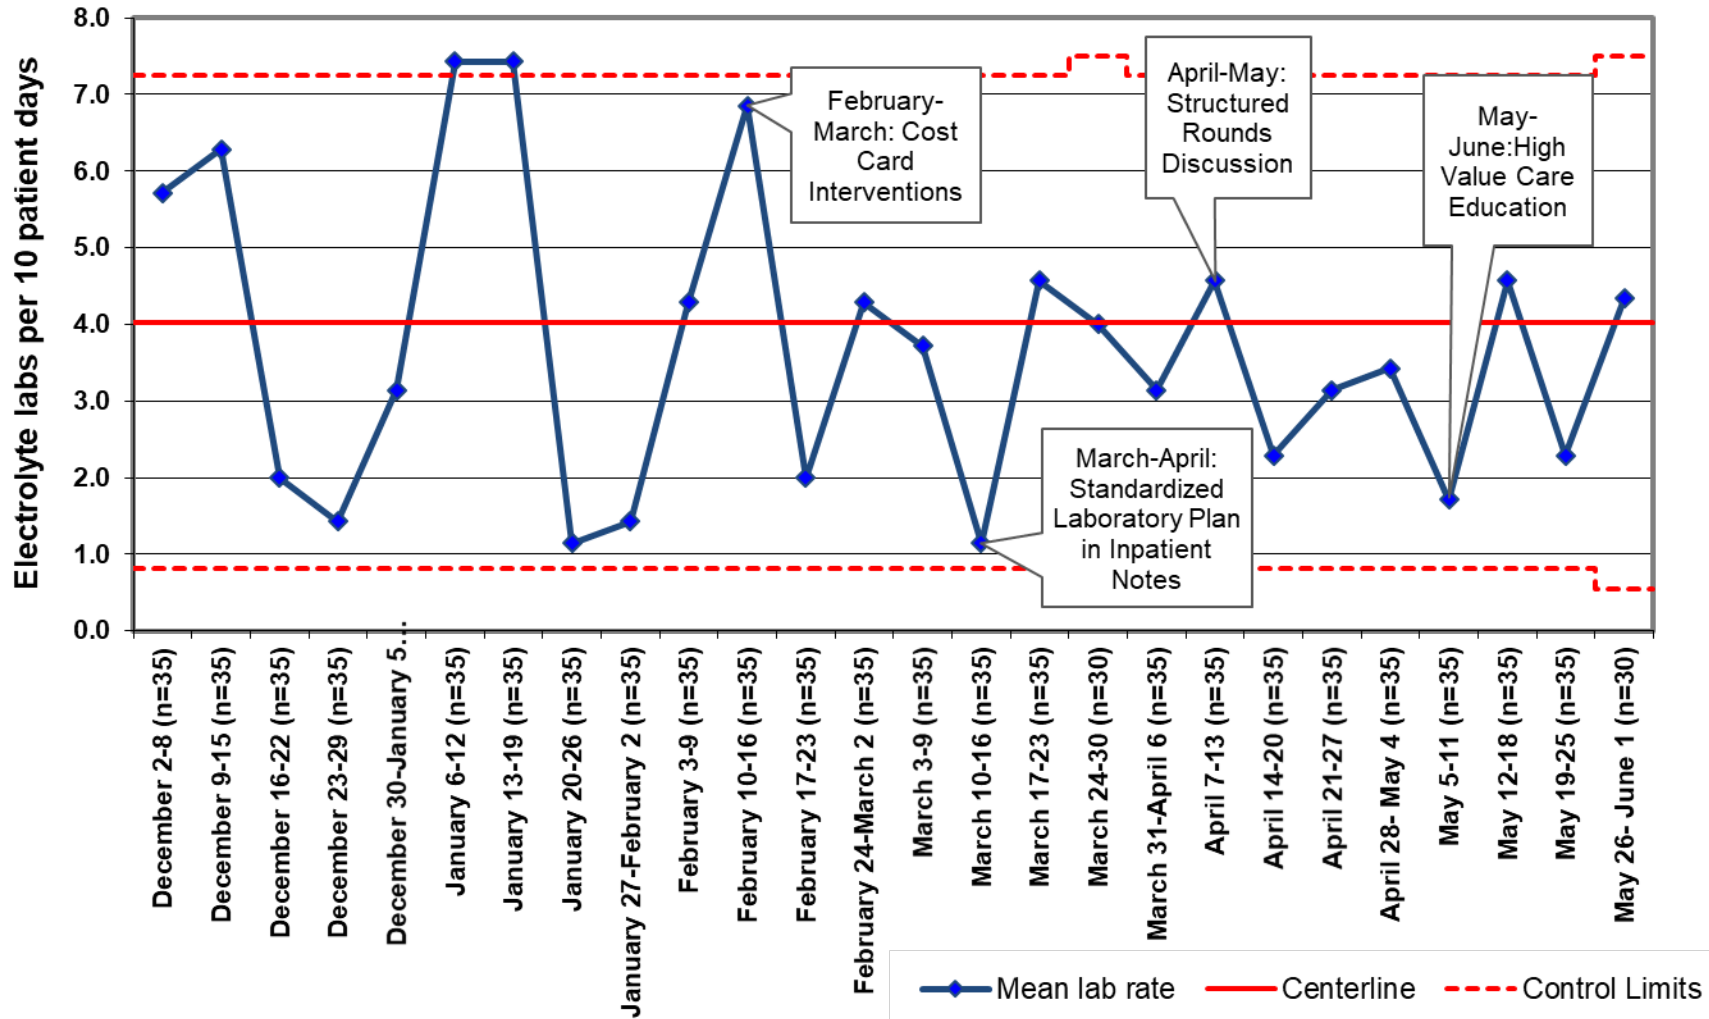

# Hospital "E" Electrolyte Labs ordered per 10 patient days

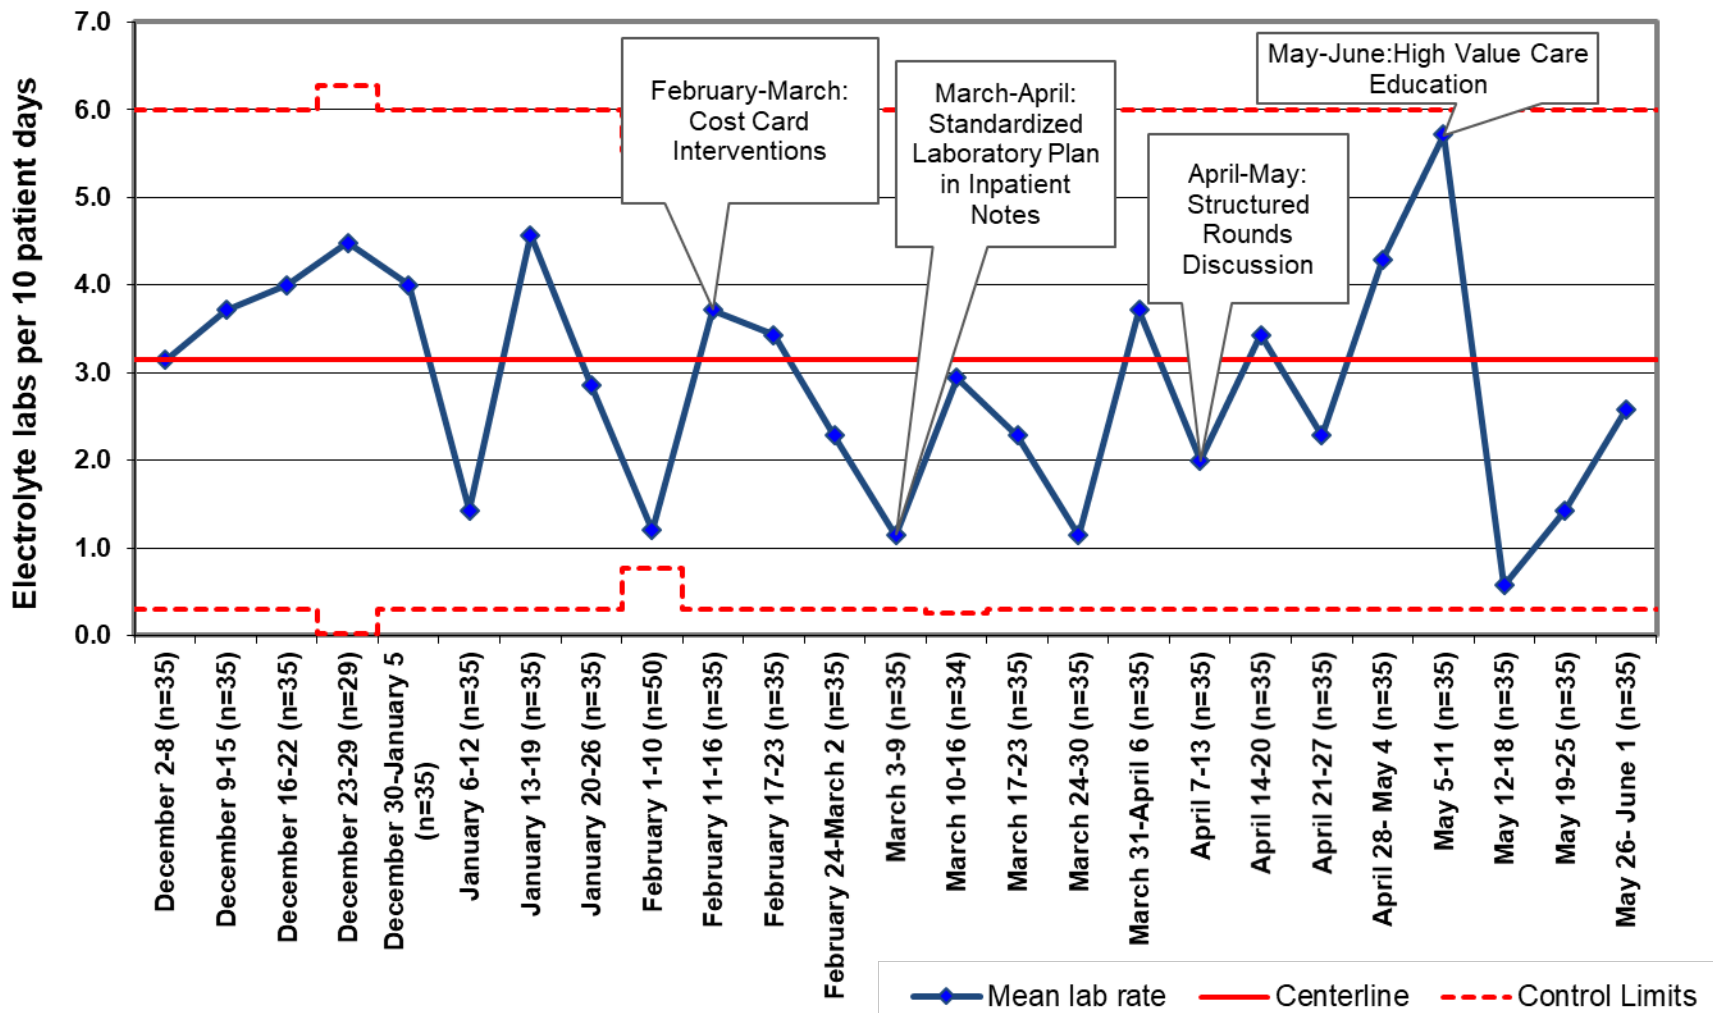

Supplement: pqs-5-e351-s003.pdf [file pqs-5-e351-s003.pdf]
